# Supplementary material for: Association of sugary drinks intake with chronic diseases in people with depression —a national cross-sectional analysis in a Chinese population
Source: Research Square preprint supplement (doi:10.21203/rs.3.rs-7131825/v1), 2025-08-11
Supplement: Supplementary file 1 [file 4dca7df9b20b6f545cc38bc9.docx]

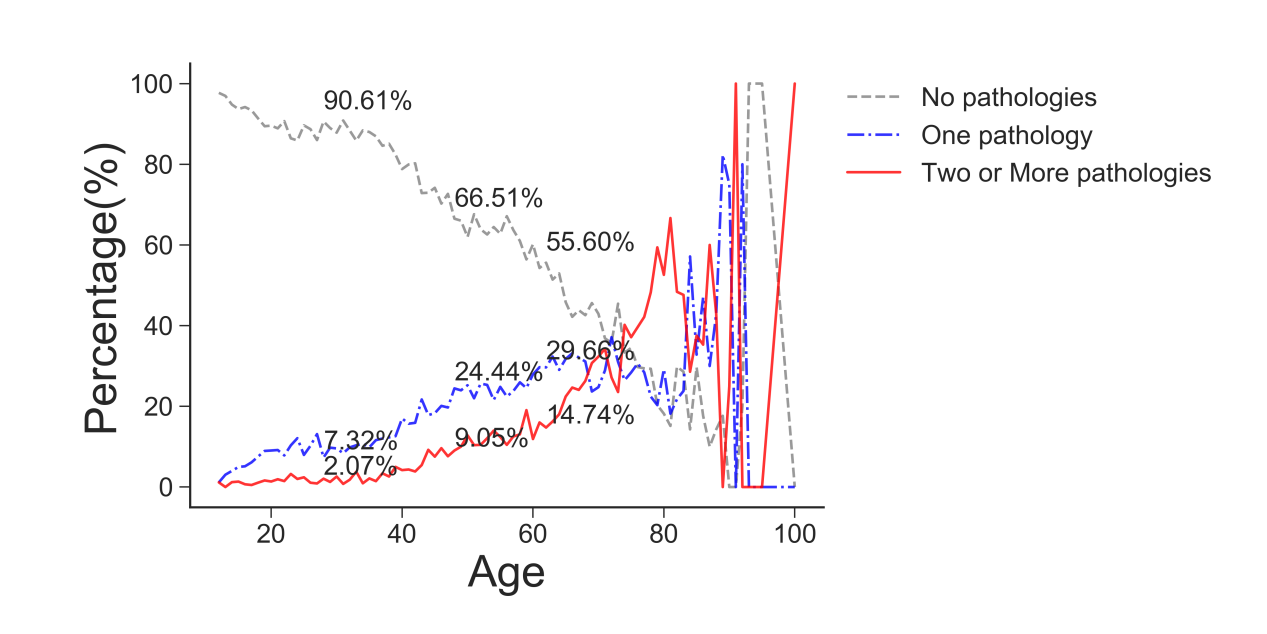


**Suppl 1. Prevalence of chronic diseases at different ages.**

**Suppl.2** **Logistic regression analysis of chronic disease risk factors in middle-aged and young people.**

| Factor | OR | P.value |
| --- | --- | --- |
| Age | 1.01(1.01-1.01) | *P*<0.001 |
| Gender | 1.02(1.01-1.04) | *P* <0.001 |
| Residence | 0.98(0.97-1.00) | 0.04 |
| Education | 0.97(0.96-0.99) | 0.001 |
| Marital status | 1.01(0.99-1.02) | 0.34 |
| Smoking | 1.01(0.99-1.03) | 0.15 |
| Drinking | 0.99(0.98-1.01) | 0.24 |
| Income | 1.04(1.02-1.05) | *P* <0.001 |
| PHQ_9 | 1.01(1.01-1.02) | *P* <0.001 |
| Sugary drinks | 0.98(0.97-1.00) | 0.01 |


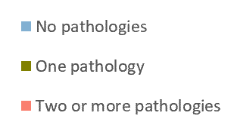

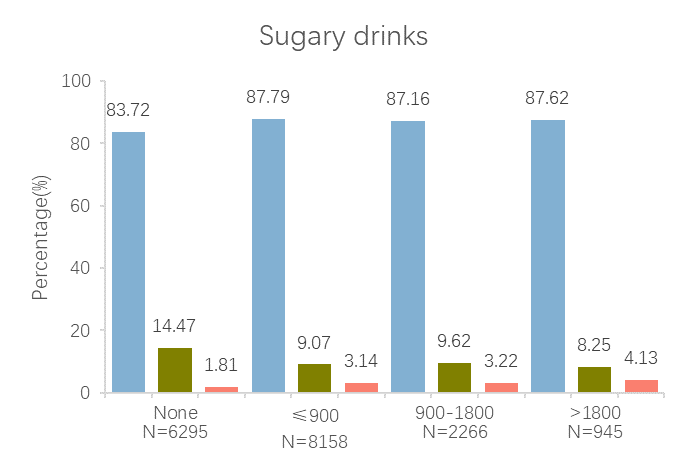


**Suppl. 3 Association of sugary drinks with chronic disease risk in the middle-aged and young population.**
